# Supplementary material
Source: publisher figshare collection journal article supplement (https://adisjournals.figshare.com/ndownloader/files/31608500)

# Higher Rates of Persistence and Adherence in Patients with Type 2 Diabetes Initiating Once-weekly Versus Daily Injectable Glucagon-like Peptide-1 Receptor Agonists in US Clinical Practice (STAY Study)

William H. Polonsky, Riya Arora, Mads Faurby, João Fernandes, Andreas Liebl

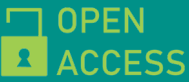

PEER-REVIEWED  
INFOGRAPHIC

## Background

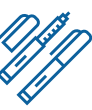

Several injectable GLP-1 RAs are available for the treatment of T2D. These are either long-acting, with **once-weekly** administration, or short-acting, requiring **daily** injections.

The **STAY study** assessed persistence with and adherence to injectable GLP-1 RAs in US clinical practice.

The study population was patients ( $\geq 18$  years) with T2D from the IBM MarketScan Explorers Claims-EMR Data Set (1 July 2012–31 January 2019).

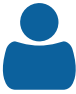

## Methods

**4311 patients** with  $\geq 1$  claim for **once-weekly** GLP-1 RAs

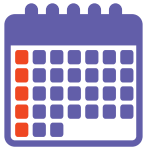

**5639 patients** with  $\geq 1$  claim for **daily** GLP-1 RAs

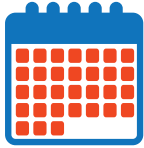

**1:1 propensity score matching**

**Balanced cohorts** with **784 patients** in each group

## Persistence

Significantly higher persistence with **once-weekly** than **daily** GLP-1 RAs

Median stay time

**Once-weekly: 333 days**  
**Daily: 269 days**

**HR: 0.80**  
(95% CI: 0.71–0.90);  
 $p < 0.01$

## Adherence

Significantly greater adherence with **once-weekly** than **daily** GLP-1 RAs

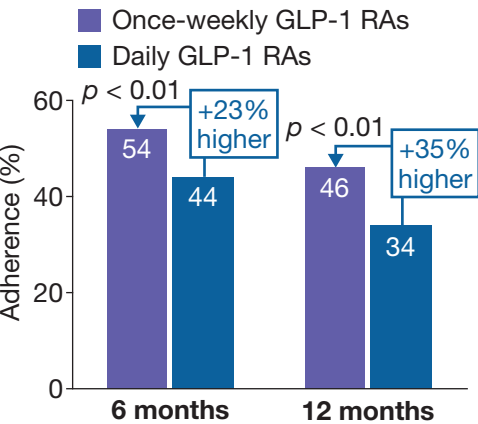

Adherence was defined as proportion of days covered  $\geq 0.8$ .

## Blood glucose levels

Greater reductions in  $HbA_{1c}$  with **once-weekly** compared with **daily** GLP-1 RAs

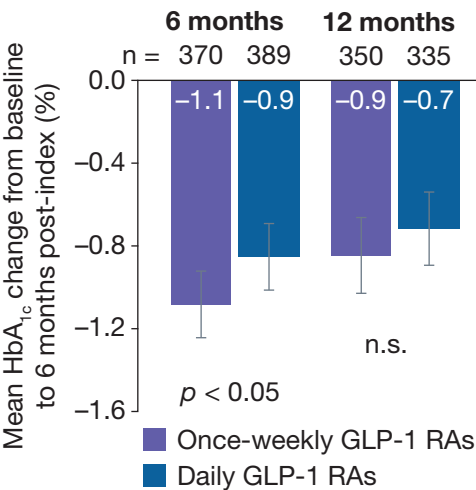

## Conclusions

- In our study, once-weekly injectable GLP-1 RAs were associated with significantly higher persistence and adherence than daily regimens over 1 year.
- Our study provides evidence that persistence and adherence, which are typically considered to be linked to patient convenience, also have **clear clinical benefits**.

CI confidence interval, GLP-1 RA glucagon-like peptide-1 receptor agonist,  $HbA_{1c}$  glycated haemoglobin, HR hazard ratio,  $n.s.$  not significant, T2D type 2 diabetes.

The graphical abstract represents the opinions of the authors. For a full list of declarations, including funding and author disclosure statements, please see the full text online. © The authors, CC-BY-NC 2021.

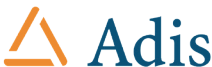

Supplement: Supplementary file 1 [file 31608500]
